# Supplementary material for: Platinated porphyrin as a new organelle and nucleus dual-targeted photosensitizer for photodynamic therapy
Source: Royal Society of Chemistry journal article supplement (doi:10.1039/c7ob01003f), 2017-01-01
Supplement: c7ob01003f1.pdf [file c7ob01003f1.pdf]

## Supporting Information

### **Platinated Porphyrin as a New Organelle and Nucleus Dual-targeted Photosensitizer for Photodynamic Therapy**

Sizhe Zhu <sup>a</sup>, Si Yao <sup>a</sup>, Fengshou Wu <sup>a\*</sup>, Lijun Jiang <sup>b</sup>, Ka-Leung Wong <sup>b\*</sup>, Ji Zhou <sup>c</sup>, Kai Wang <sup>a,c\*</sup>

<sup>a</sup> Key Laboratory for Green Chemical Process of Ministry of Education, Wuhan Institute of Technology, Wuhan, P. R. China.

<sup>b</sup> Department of Chemistry, Hong Kong Baptist University, Kowloon Tong, Hong Kong, P. R. China.

<sup>c</sup> Hubei Key Lab of Novel Reactor & Green Chemical Technology, Wuhan Institute of Technology, Wuhan, P. R. China.

#### **1. DNA binding affinity and mode**

The binding constants (K) of Pt-Por-RB and Me-Por-RB were calculated by the equation (1).

$$[DNA]/\Delta\varepsilon_{ap}=[DNA]/\Delta\varepsilon+1/(\Delta\varepsilon K) \quad (1)$$

$$\Delta\varepsilon_{ap}=|\varepsilon_A-\varepsilon_F|; \quad \Delta\varepsilon=|\varepsilon_B-\varepsilon_F|;$$

Where the [DNA] is the CT DNA concentration,  $\varepsilon_A$ ,  $\varepsilon_B$ ,  $\varepsilon_F$  is the apparent extinction coefficient, the extinction coefficient of bound porphyrin and the extinction coefficient of free porphyrin. The fitting curves were shown in Fig S1.

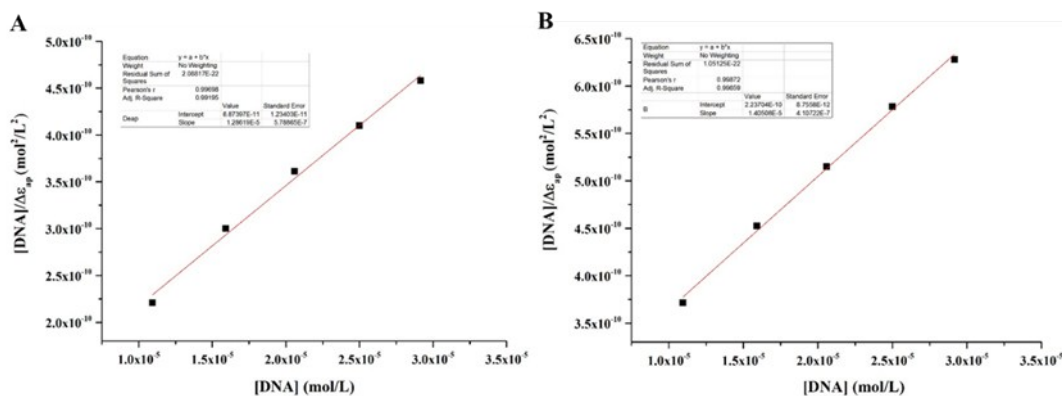

**Fig. S1.** The relations between the  $[DNA]/\Delta \epsilon_{sp}$  and  $[DNA]$  of (A) Pt-Por-RB; (B) Me-Por-RB

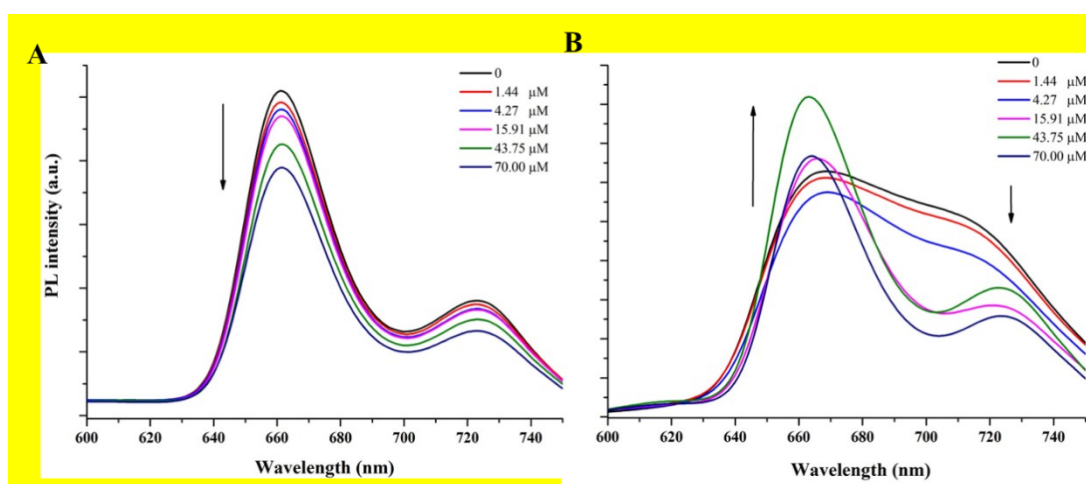

**Fig. S2.** Emission spectra of (A) Pt-Por-RB; (B) Me-Por-RB; with titration of CT DNA (from 0 to 70  $\mu\text{M}$ )

The fluorescence spectrophotometric titrations of porphyrins with CT DNA (from 0 to 70  $\mu\text{M}$ ) were performed as shown in Fig. S2. The change of PL spectrum for Pt-Por-RB and Me-Por-RB were different after the addition of CT DNA. At low concentration of CT DNA (0 to 4.27  $\mu\text{M}$ ), the PL intensity of Me-Por-RB was only slightly reduced related to Pt-Por-RB (significantly decrease), probably due to the self-stacking of porphyrin on the surface of CT DNA. However, the emission spectrum of Me-Por-RB increased significantly when the concentration of DNA is beyond 4.27  $\mu\text{M}$ , indicating the interaction mode between porphyrin and CT DNA was changed from self-stacking to intercalation at high concentration of CT DNA.

## 2. NMR and MS spectra of compounds

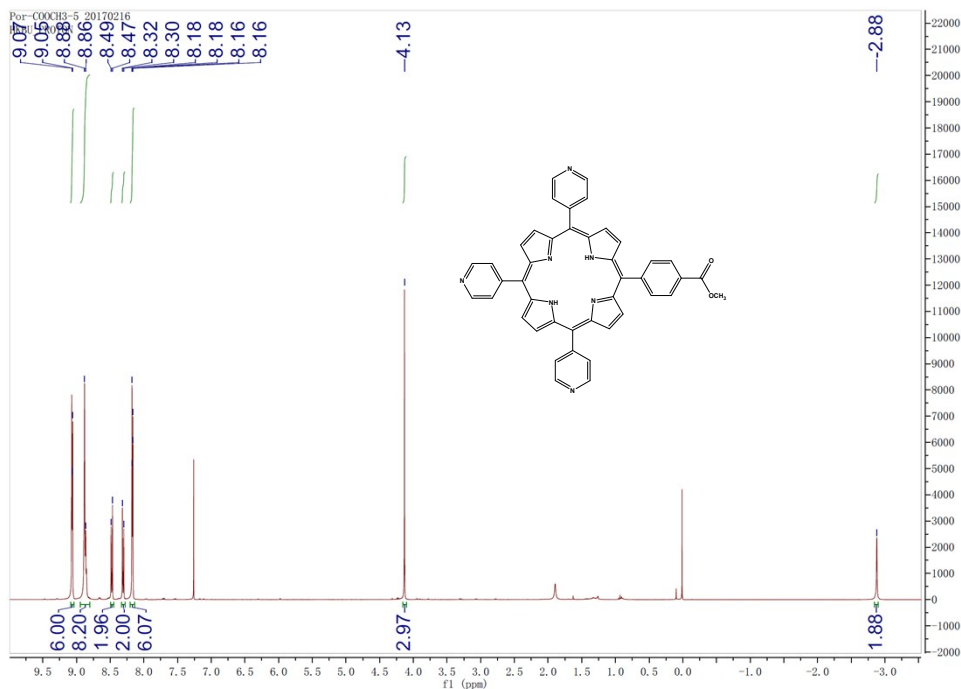

**Fig. S3.**  $^1\text{H-NMR}$  ( $\text{CDCl}_3$ ) spectrum of meso-5-(4'-carboxymethylphenyl)-10,15,20-tris(4'-pyridyl)porphyrin

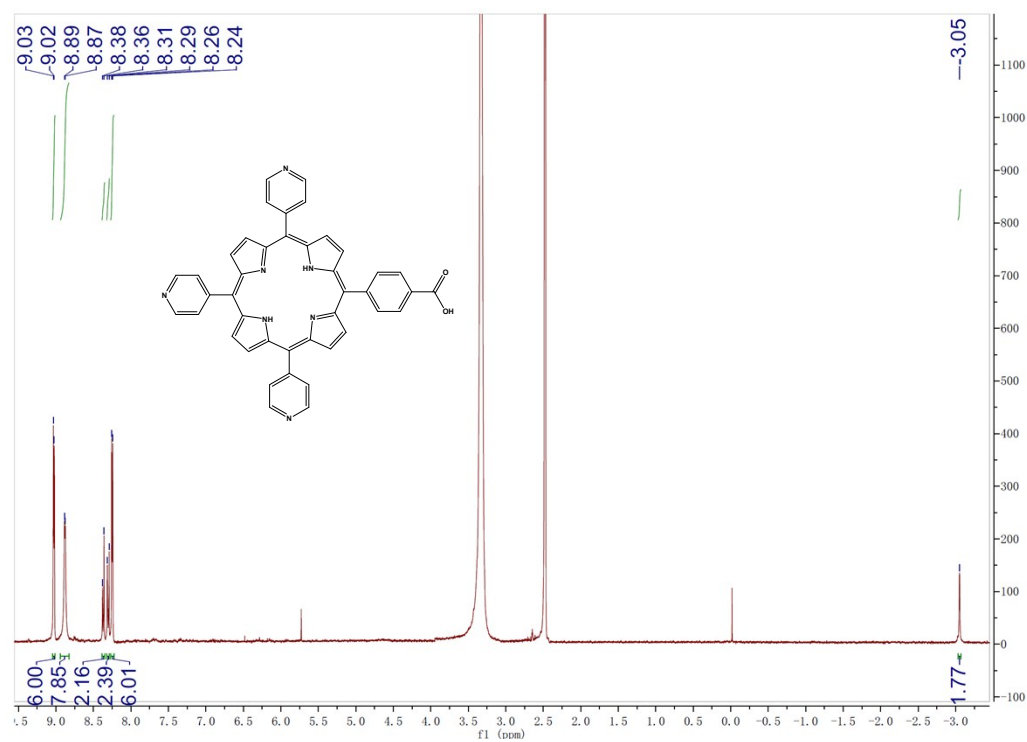

**Fig. S4.**  $^1\text{H-NMR}$  ( $\text{DMSO-d}_6$ ) spectrum of Por

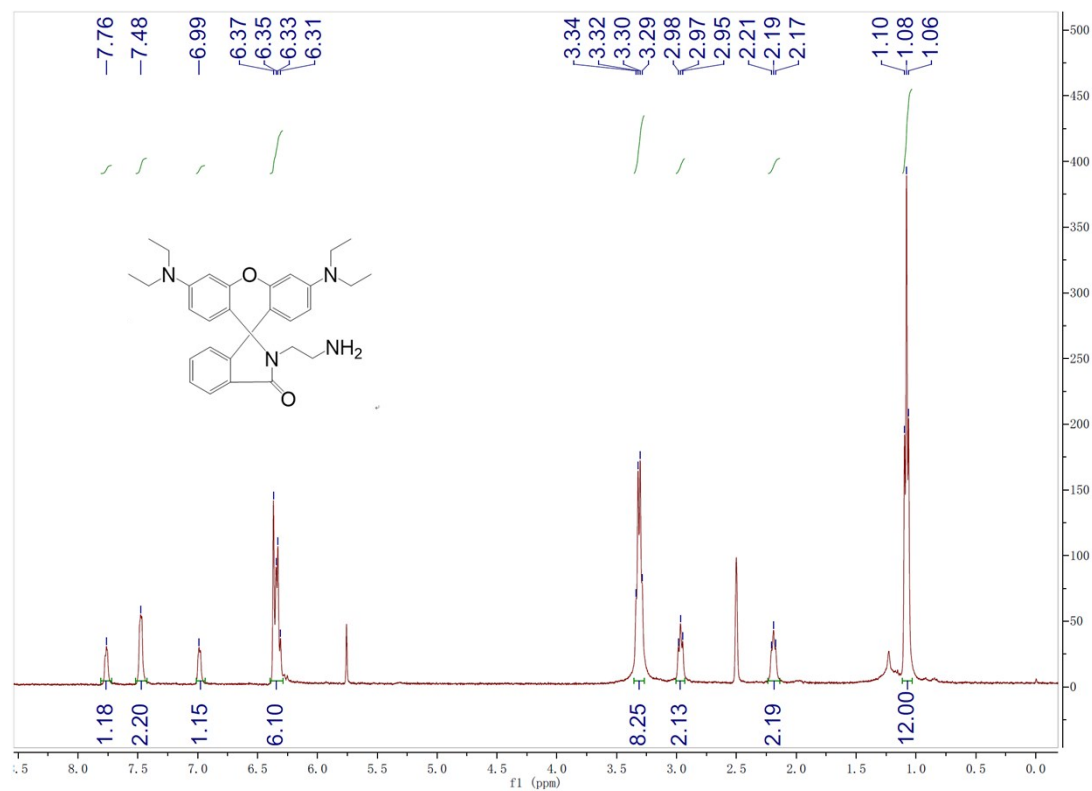

**Fig. S5.**  $^1\text{H-NMR}$  ( $\text{DMSO-d}_6$ ) spectrum of RB-NH $_2$

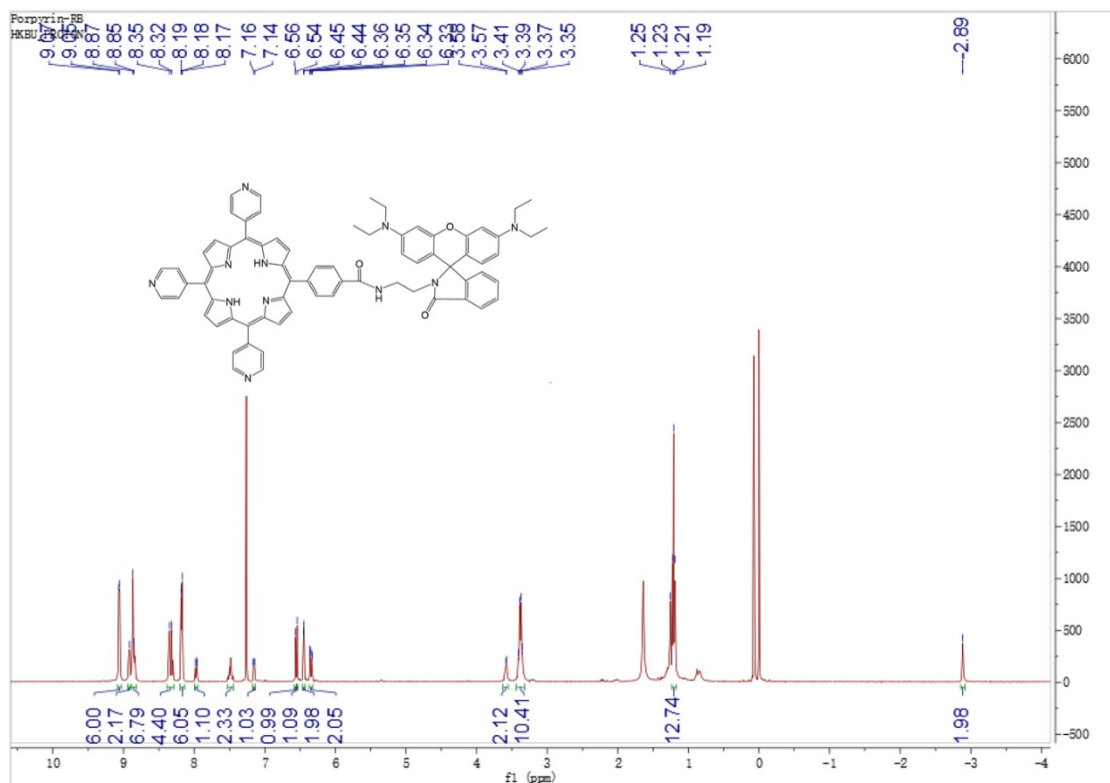

**Fig. S6.**  $^1\text{H-NMR}$  ( $\text{CDCl}_3$ ) spectrum of Por-RB

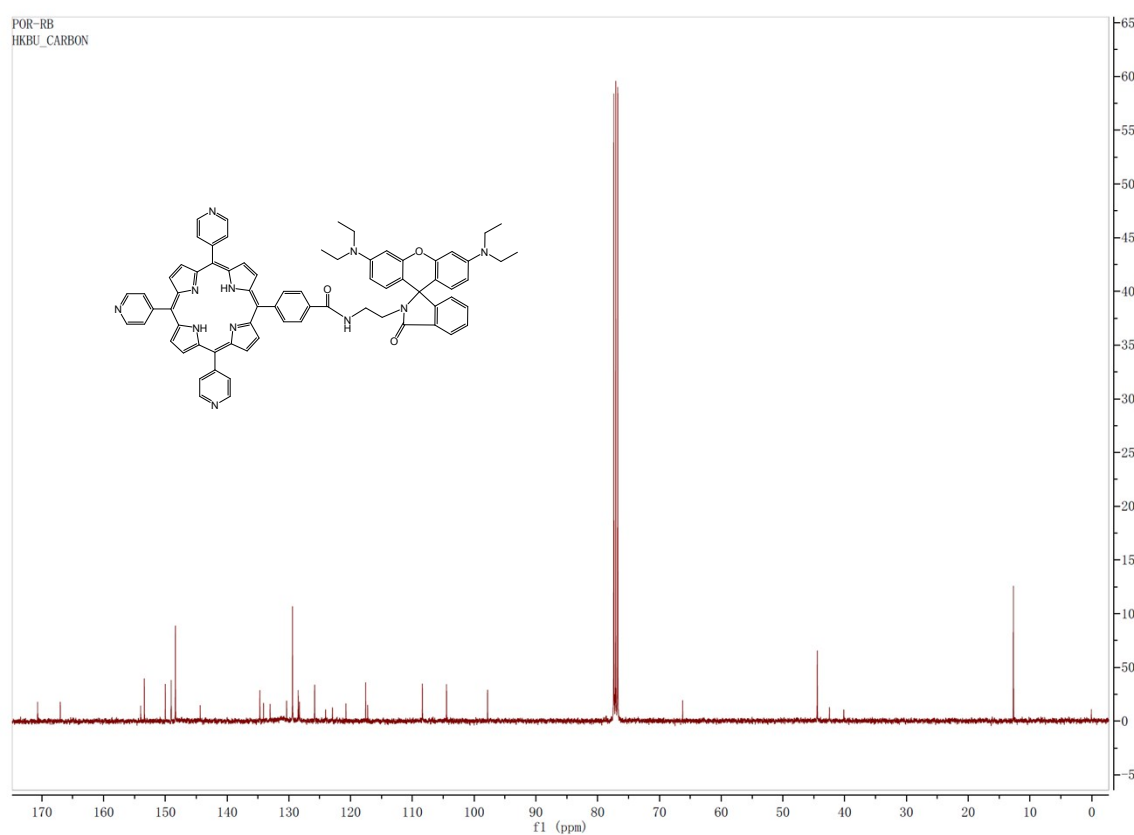

**Fig.S7.**  $^{13}\text{C-NMR}$  ( $\text{CDCl}_3$ ) spectrum of Por-RB

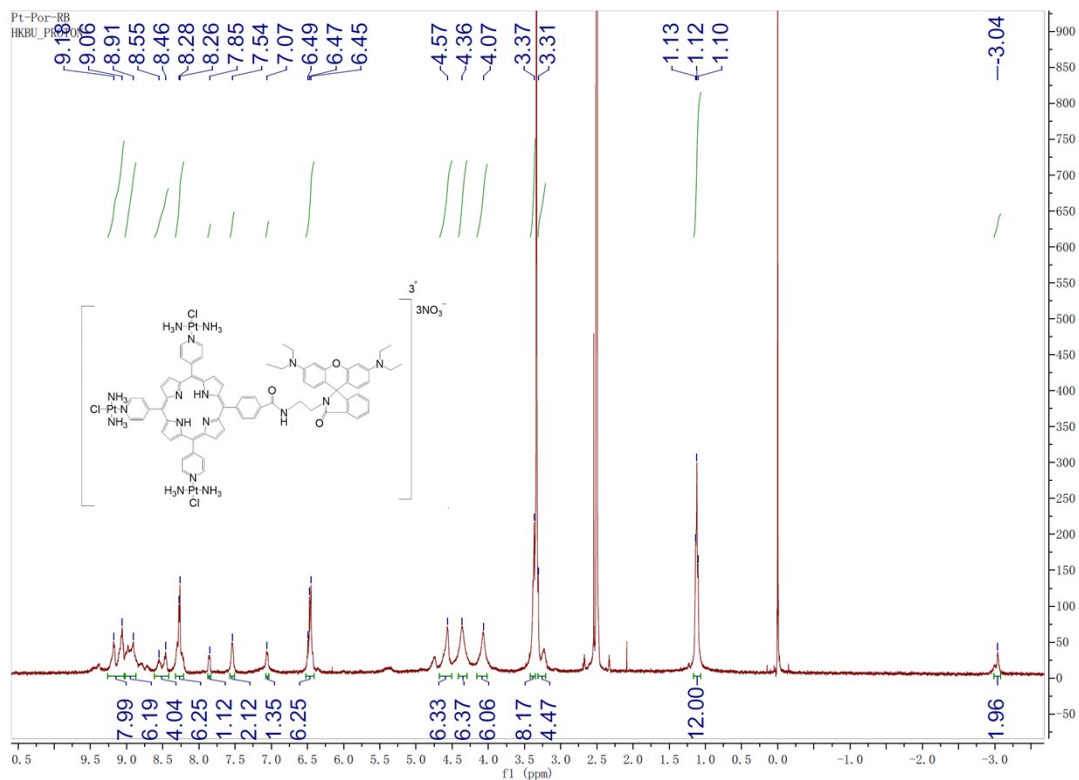

**Fig. S8.** <sup>1</sup>H-NMR (DMSO-d<sub>6</sub>) spectrum of Pt-Por-RB

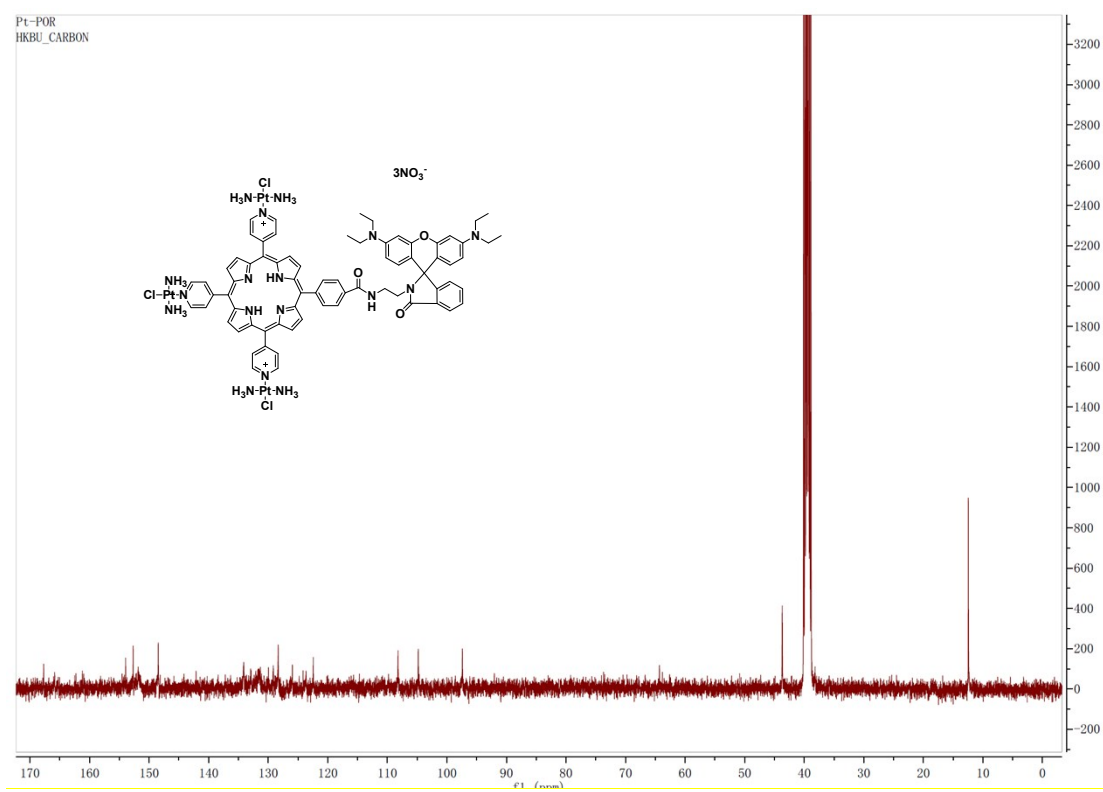

**Fig.S9.** <sup>13</sup>C-NMR (DMSO-d<sub>6</sub>) spectrum of Pt-Por-RB

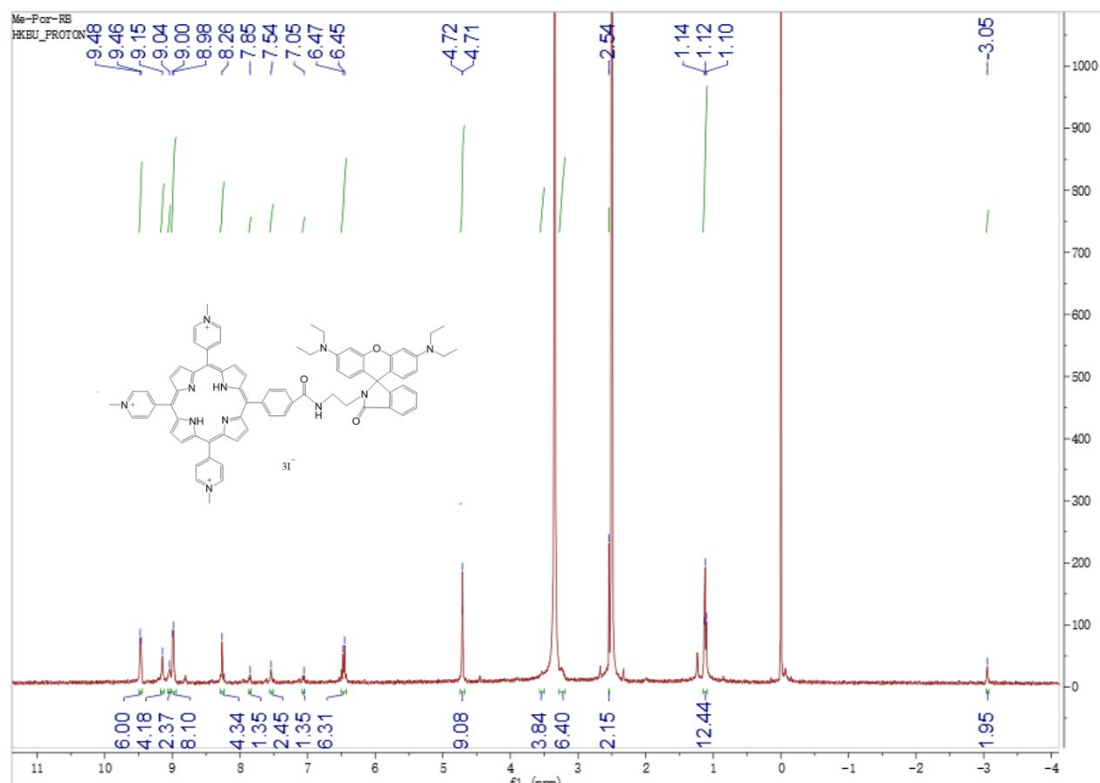

**Fig. S10.**  $^1\text{H-NMR}$  ( $\text{DMSO-d}_6$ ) spectrum of Me-Por-RB

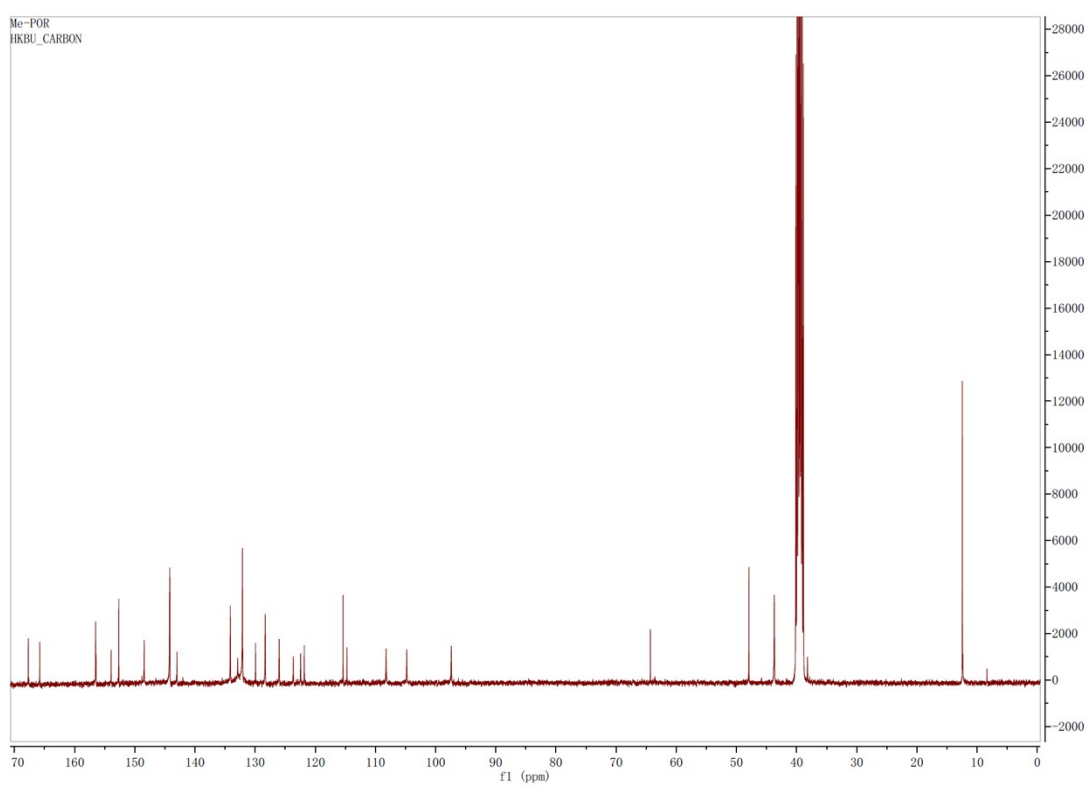

**Fig.S11.**  $^{13}\text{C-NMR}$  ( $\text{DMSO-d}_6$ ) spectrum of Me-Por-RB

HONG KONG BAPTIST UNIVERSITY, DEPARTMENT OF CHEMISTRY (MALDI-TOF)

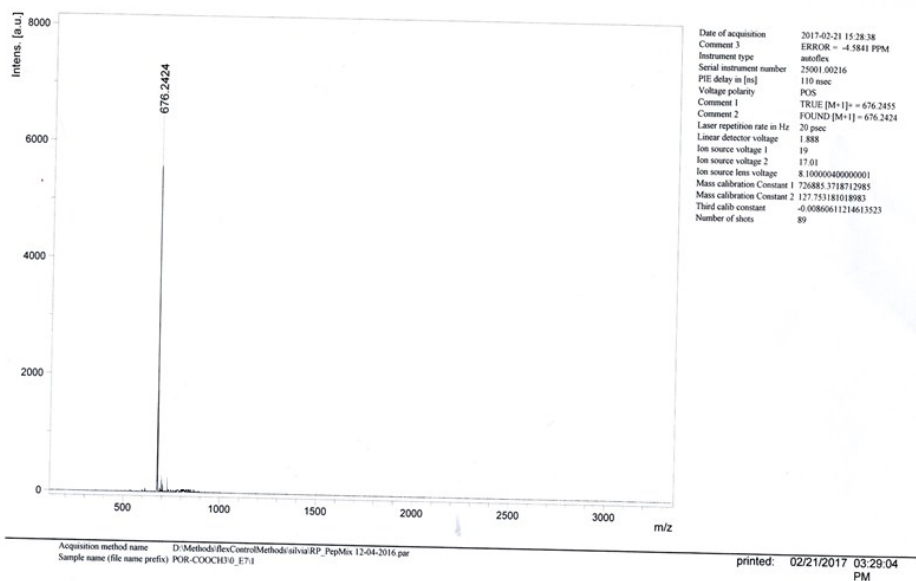

Fig. S12. MALDI-TOF spectrum of meso-5-(4'-carboxymethylphenyl)-10,15,20-tris(4'-pyridyl)porphyrin

HONG KONG BAPTIST UNIVERSITY, DEPARTMENT OF CHEMISTRY (MALDI-TOF)

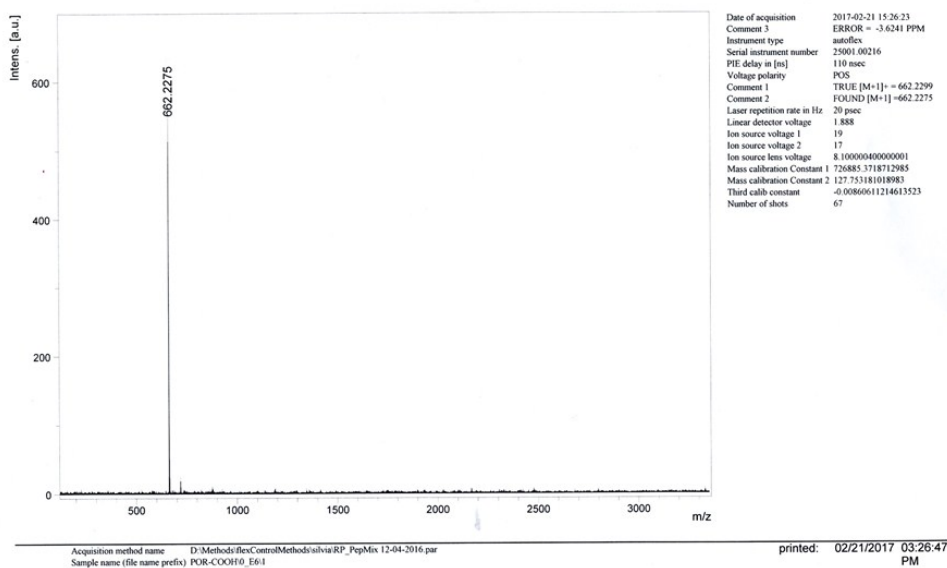

Fig. S13. MALDI-TOF spectrum of Por



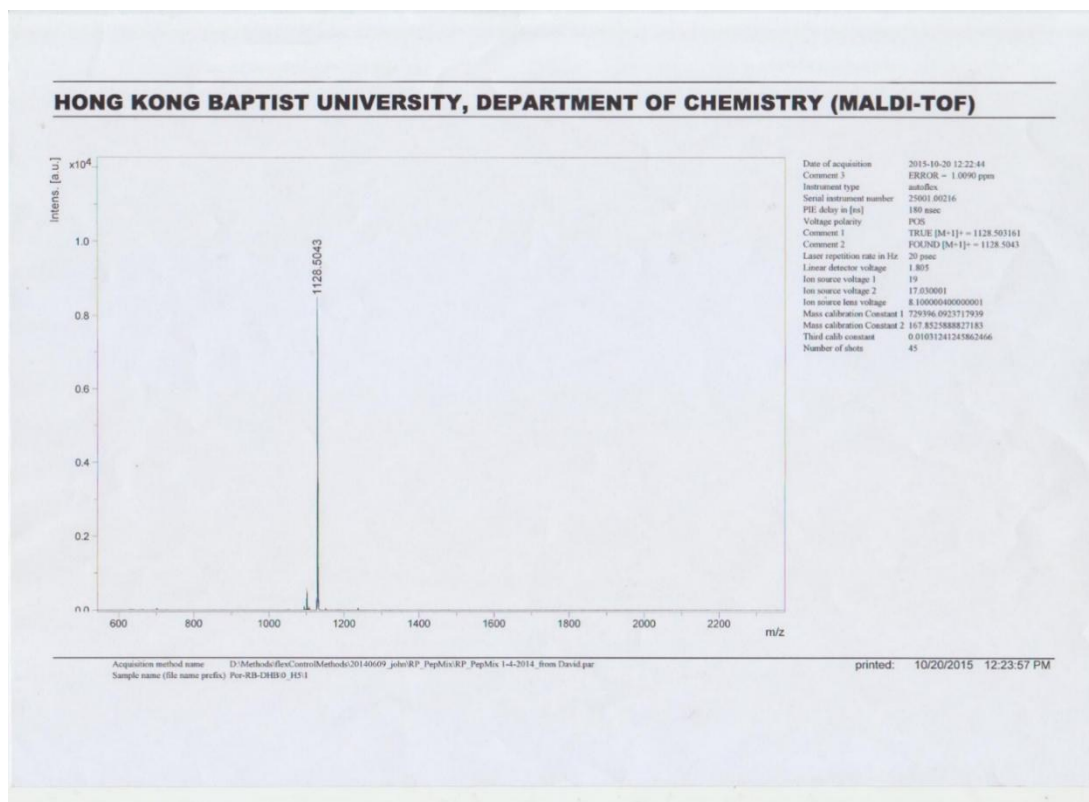

**Fig. S14.** MALDI-TOF spectrum of Por-RB

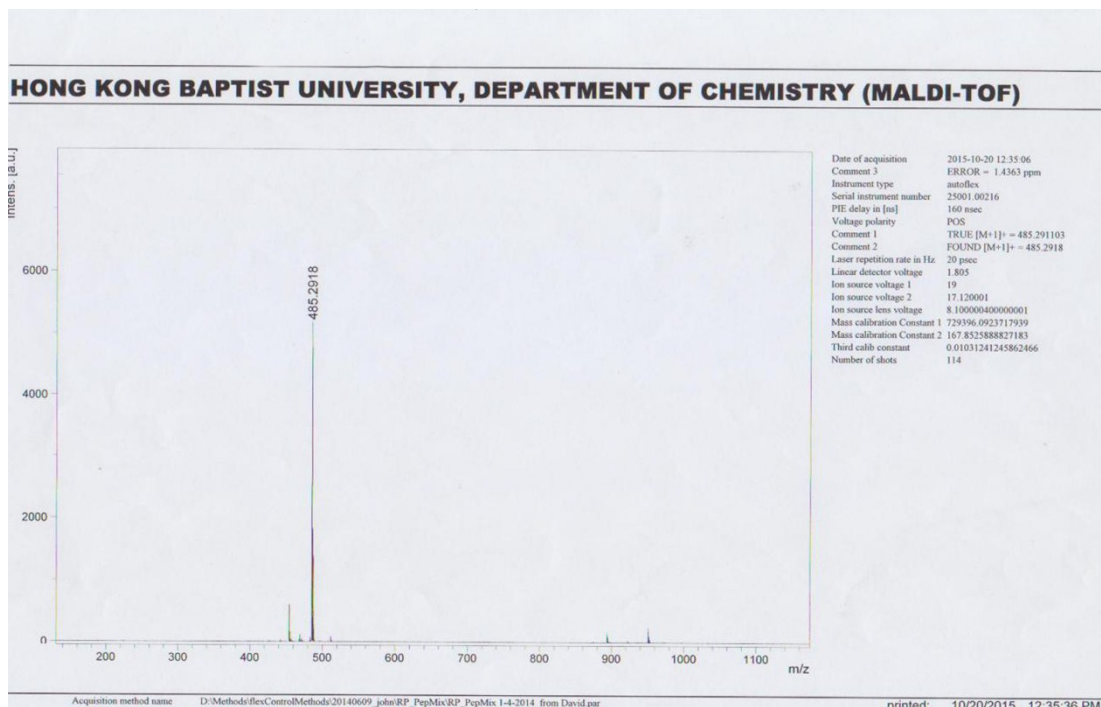

**Fig.S15.** MALDI-TOF spectrum of RhB-NH<sub>2</sub>

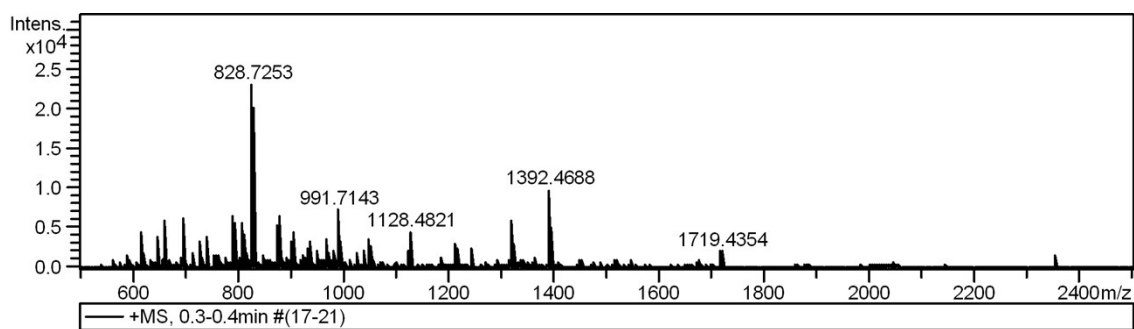

**Fig. S16.** ESI-MS spectrum of Pt-Por-RB

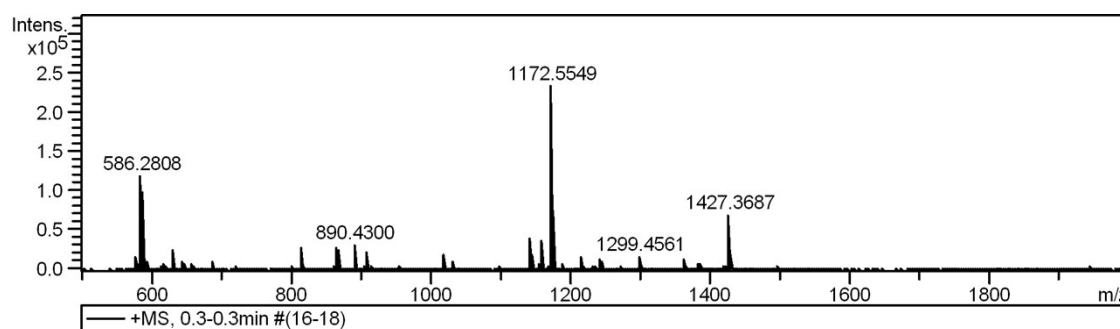

**Fig. S17.** ESI-MS spectrum of Me-Por-RB
